# Supplementary material for: Improving Payload Efficiency in Open-Pit Mining: An Integrated Model Using Six Sigma and Artificial Intelligence
Source: Research Square preprint supplement (doi:10.21203/rs.3.rs-7530791/v1), 2025-09-18
Supplement: Supplementary file 1 [file e1691b5397ff60335b0243ea.docx]

**Appendix**

Additional material can be found at the following address of Data Mendeley:

Quiroz Flores, Juan Carlos (2025), “Improving Payload Efficiency in Open-Pit Mining: An Integrated Model Using Six Sigma and Artificial Intelligence”, Mendeley Data, V1, doi: 10.17632/v3pv2ys3rz.1
